# Supplementary material
Source: Springer Nature journal article supplement (https://www.springermedizin.de/resource/supplementary/12955_2008_568_MOESM3_ESM.pdf/9560732)

German school marks  
Mean $\pm$ SD · 1 is best

Practice assistants:

Technical feasibility

Feasibility of routine integration

Patients:

Nurses' explanations

User-friendliness of QL-Recorder

Comprehensibility of questions

Comprehensibility of results

Physicians:

Feasibility of routine integration

Importance of immediate results

Comprehensibility of results

Benefit of HRQoL assessment

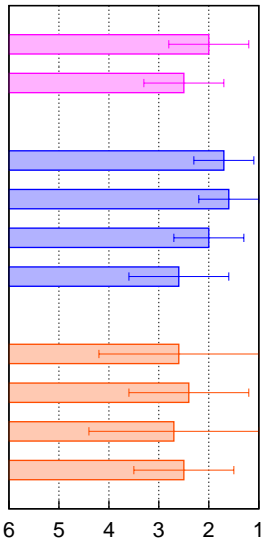

Supplement: MOESM3 [file 9560732]
